# Supplementary material for: Biomineralization through a Symmetry-Controlled Oligomeric Peptide
Source: MDPI journal article supplement (doi:10.3390/biomimetics8080606), 2023-12-14
Supplement: s1 [file s1]

## Biom mineralization through a symmetry-controlled oligomeric peptide

Tatsuya Sakaguchi <sup>1,2,†</sup>, Natsumi Nakagawa <sup>1,†</sup>, Kenta Mine <sup>1</sup>, Jose Isagani B. Janairo <sup>3</sup>, Rui Kamada <sup>1</sup>, James G. Omichinski <sup>4\*</sup>, and Kazuyasu Sakaguchi <sup>1,\*</sup>

1. Laboratory of Biological Chemistry, Department of Chemistry, Faculty of Science, Hokkaido University, Sapporo 060-0810, Japan; sakaguchi\_tatsuya@kurume-u.ac.jp (T.S.); n-nakagawa@sci.hokudai.ac.jp (N.N.); kenta.mine@outlook.com (K.M.), kamadar@sci.hokudai.ac.jp (R.K.)
2. Department of Chemistry, Kurume University School of Medicine, Kurume 830-0011, Japan.
3. Biology Department, De La Salle University, 2401 Taft Avenue, 0922 Manila, Philippines.
4. Département de Biochimie et Médecine Moléculaire, Université de Montréal, H3C 3J7 QC, Canada; jg.omichinski@umontreal.ca

\* Correspondence: jg.omichinski@umontreal.ca (J.G.O.); kazuyasu@sci.hokudai.ac.jp (K.S.)

† These authors contributed equally to this work.

### Content:

- **Table S1:** Peptide sequences of TBP-CC peptides.
- **Table S2:** DNA sequences of frame strands.
- **Figure S1:** HPLC profiles of the synthesized peptides.
- **Figure S2:** MALDI-TOF MS spectra of the synthesized peptides.
- **Figure S3:** Change in ellipticity at 222 nm as a function of temperature for TBP-CC peptides
- **Figure S4:** Change in ellipticity at 275 nm as a function of temperature for TBP-DNA oligomers.
- **Figure S5:** Histogram and Kernel Density Estimate (KDE) plot of silver nanoparticle sizes produced by TBP-DNAs.

**Table S1.** Peptide sequences of TBP-CC peptides

| Name        | Sequence                                                        |
|-------------|-----------------------------------------------------------------|
| TBP-CC(Di)  | H-RKLPDAGGRMKQLEDKVEELLSKNYHLENEVARLKKLVGER-NH <sub>2</sub>     |
| TBP-CC(Tri) | H-RKLPDAGGSGIDQEQQNNLTRLIEAQIHELQLTQWKIKQLLARIL-NH <sub>2</sub> |
| TBP-CC(Tet) | H-RKLPDAGGGELAAIKQELAAIKKELAAIKWELAAIKQGAG-NH <sub>2</sub>      |

**Table S2.** DNA sequences of frame strands used in TBP-DNA constructs

| Strand ID | Sequence                   |
|-----------|----------------------------|
| S1        | 5'-AACCTG CGAAGT ctatcg-3' |
| S2        | 5'-ACTTCG CAGGTT ctatcg-3' |
| S3        | 5'-ACTTCG GATGCA ctatcg-3' |
| S4        | 5'-TGCATC CAGGTT ctatcg-3' |
| S5        | 5'-TGCATC GACCAT ctatcg-3' |
| S6        | 5'-ATGGTC CAGGTT ctatcg-3' |

(a)

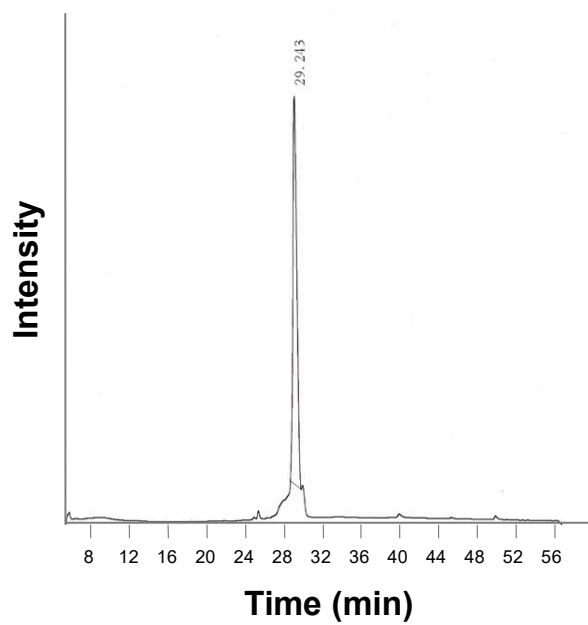

(b)

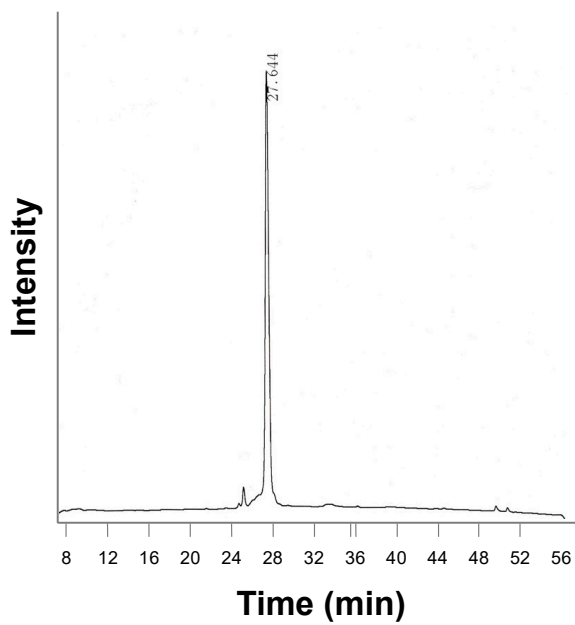

(c)

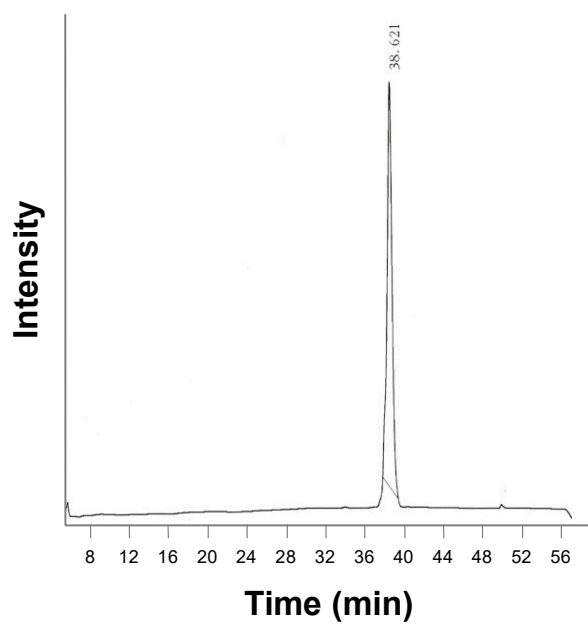

(d)

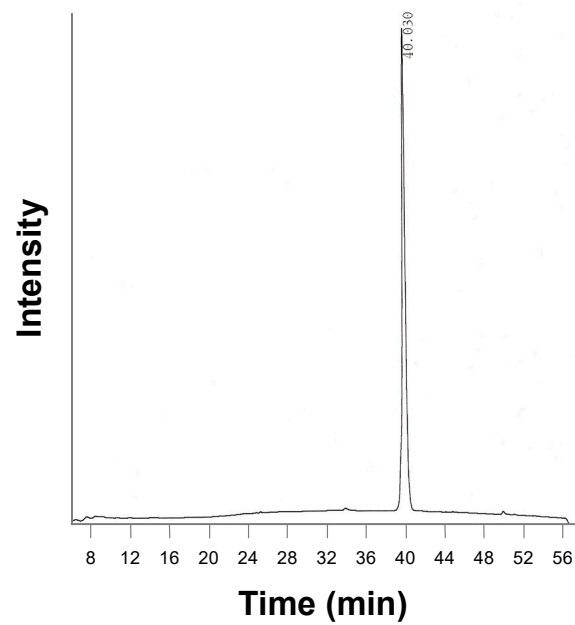

(e)

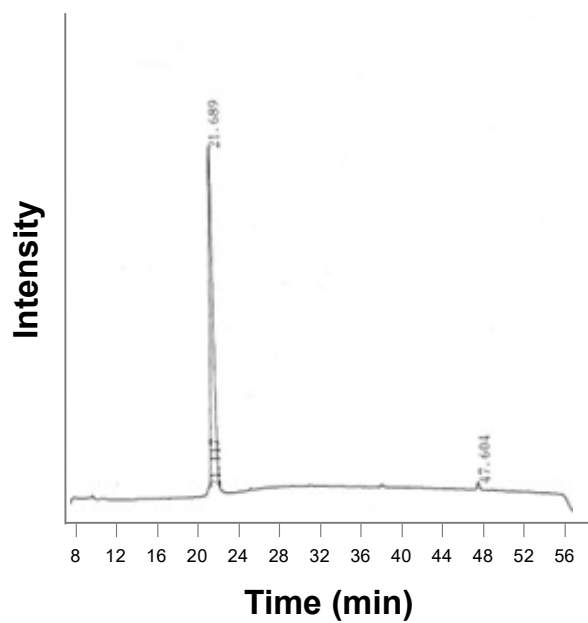

(f)

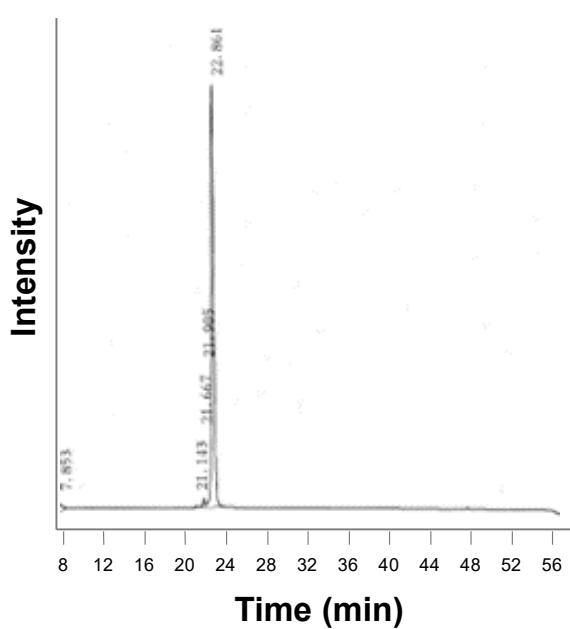

(g)

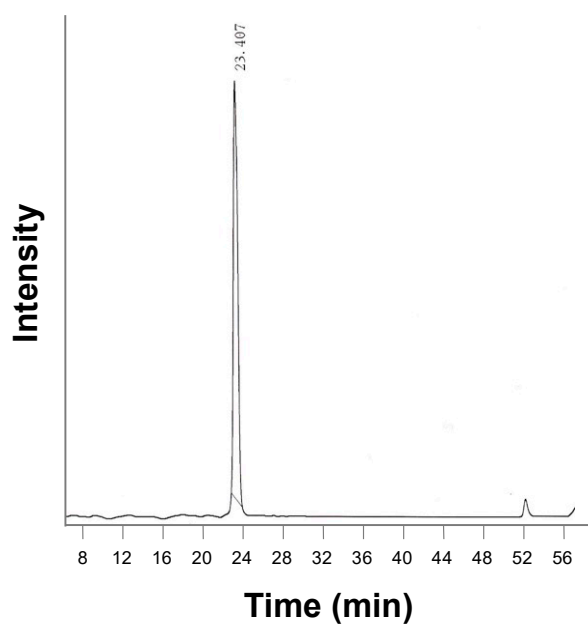

**Figure S1.** HPLS profiles of the synthesized peptides. (a) TBP-CC(Di), (b) CC(Di), (c) TBP-CC(Tri), (d) CC(Tri), HPLS profiles of the synthesized peptides. (e) TBP-CC(Tet), (f) CC(Tet), (g) TBP-GlyGlyCys

**(a)**  $[\text{MH}]^+(\text{ave, calc}): 4791.61$

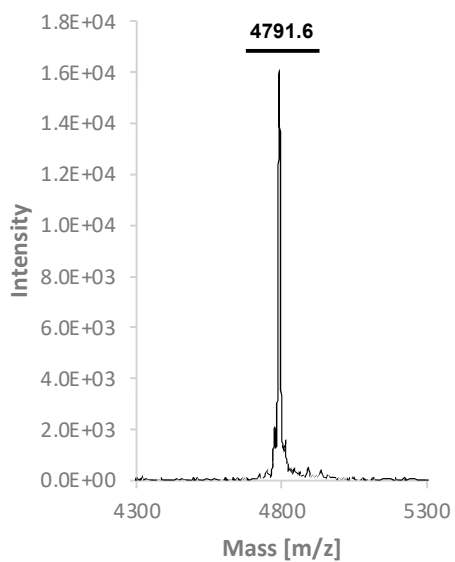

**(b)**  $[\text{MH}]^+(\text{ave, calc}): 3996.70$

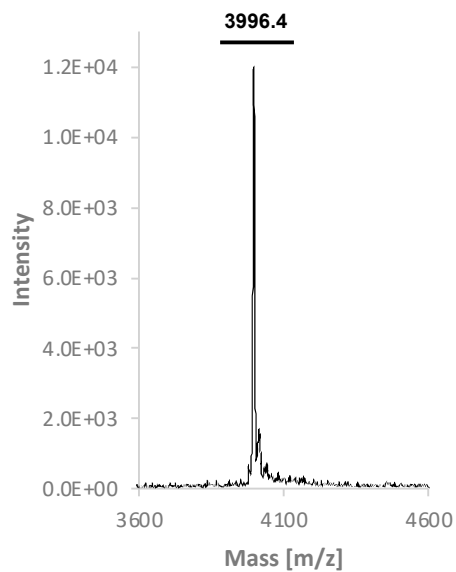

**(c)**  $[\text{MH}]^+(\text{ave, calc}): 5050.90$

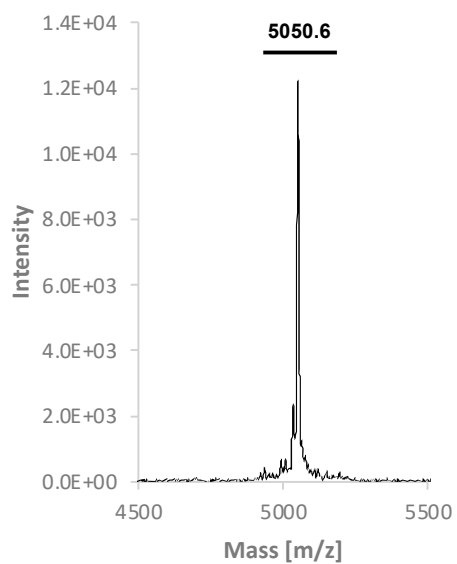

**(d)**  $[\text{MH}]^+(\text{ave, calc}): 4255.99$

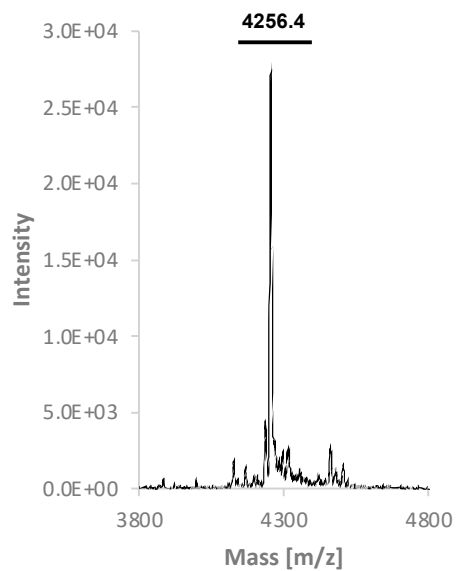

(e)  $[MH]^+$ (ave,calc): 4128.93

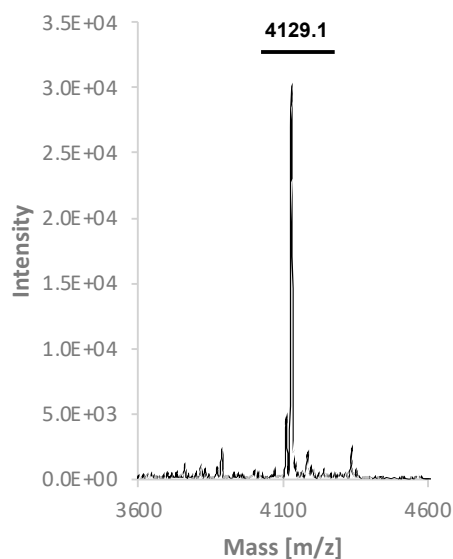

(f)  $[MH]^+$ (ave, calc): 3334.01

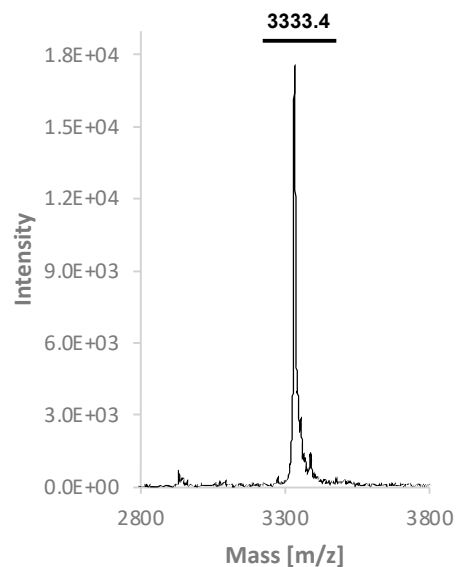

(g)  $[MH]^+$ (ave, calc): 916.1

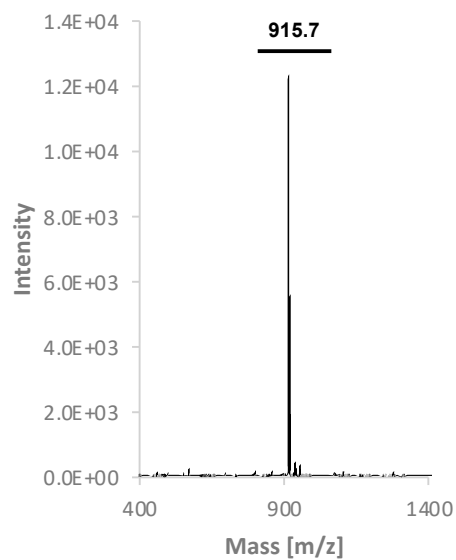

**Figure S2.** MALDI-TOF MS spectra of the synthesized peptides. (a) TBP-CC(Di), (b) CC(Di), (c) TBP-CC(Tri), (d) CC(Tri), MALDI-TOF MS spectra of the synthesized peptides. (e) TBP-CC(Tet), (f) CC(Tet), (g) TBP-GlyGlyCys

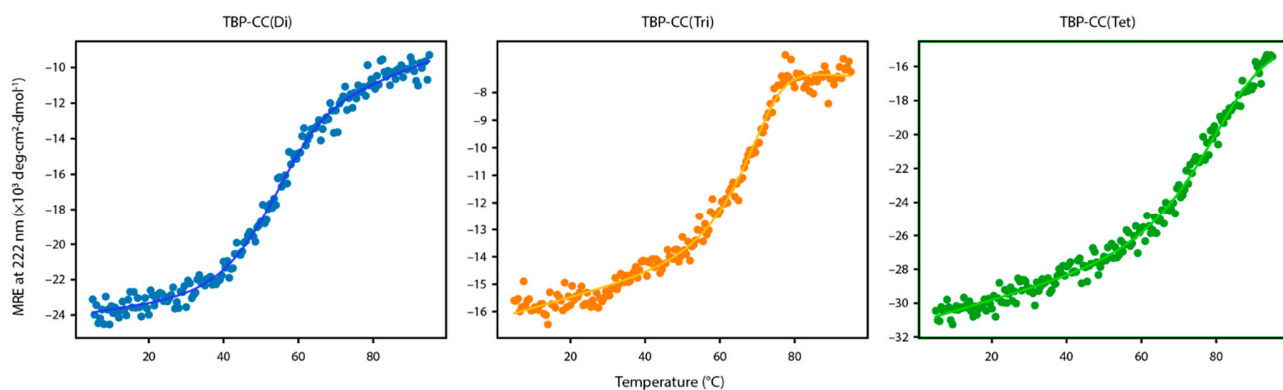

**Figure S3.** Change in ellipticity at 222 nm as a function of temperature for TBP-CC peptides. The temperature-dependent curves are shown for the TBP-CC(Di) peptide (**left panel**), the TBP-CC(Tri) peptide (**center panel**), and the TBP-CC(Tet) peptide (**right panel**). Peptide solutions were prepared at a concentration of 10  $\mu\text{M}$  in a 20 mM phosphate buffer (pH 7.4). Temperature variation was monitored from 4°C to 96°C, with a scanning rate of 1°C per minute.

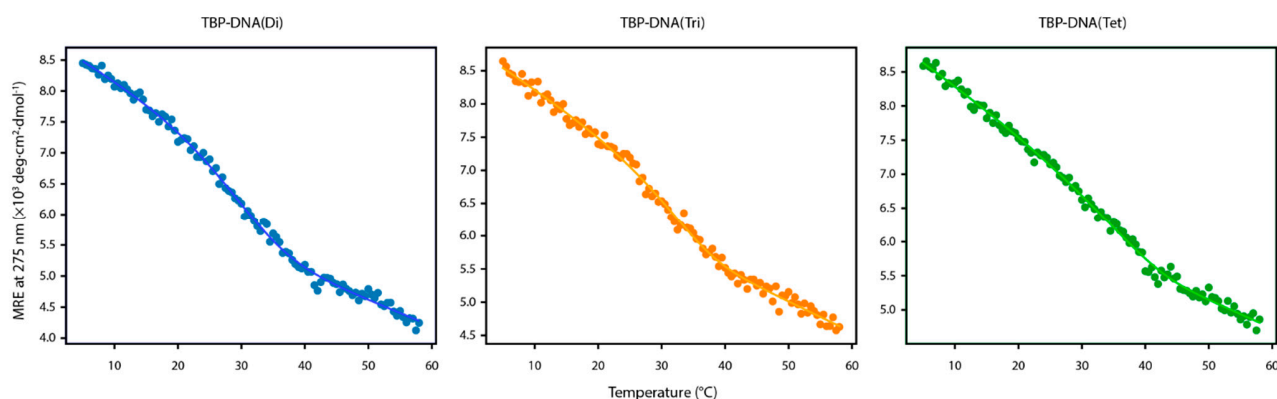

**Figure S4.** Change in ellipticity at 275 nm as a function of temperature for TBP-DNA oligomers. The temperature-dependent curves are shown for the TBP-DNA(Di) peptide (**left panel**), the TBP-DNA(Tri) peptide (**center panel**), and TBP-DNA(Tet) peptide (**right panel**). The solutions were prepared with a concentration of 20  $\mu\text{M}$  monomer strands in a 20 mM phosphate buffer (pH 7.4). The temperature ranged from 4°C to 58°C, and the scan rate was set at 1°C per minute.

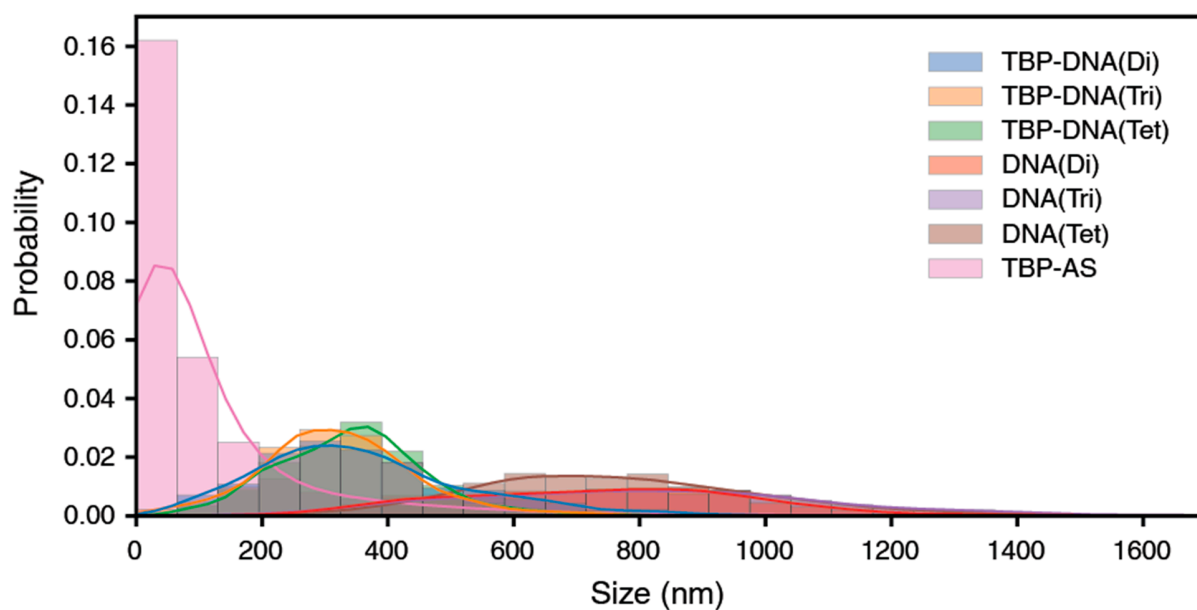

**Figure S5.** Histogram and Kernel Density Estimate (KDE) plot of silver nanoparticle sizes produced by TBP-DNA(Di) (blue), TBP-DNA(Tri) (orange), TBP-DNA(Tet) (green), DNA(Di) (red), DNA(Tri) (purple), DNA(Tet) (brown), and TBP-AS (pink). The number of particles analyzed for TBP-DNA(Di), TBP-DNA(Tri), TBP-DNA(Tet), DNA(Di), DNA(Tri), DNA(Tet), and TBP-SA were N=1500, N=1397, N=1356, N=973, N=1071, N=1304, and N=3035, respectively.
